# Supplementary material
Source: Springer Nature journal article supplement (https://www.springermedizin.de/resource/supplementary/13054_2011_9922_MOESM1_ESM.pdf/9708468)

## Spectrum of Hepatorenal Disease in Patients with Advanced Cirrhosis

*Background renal function*

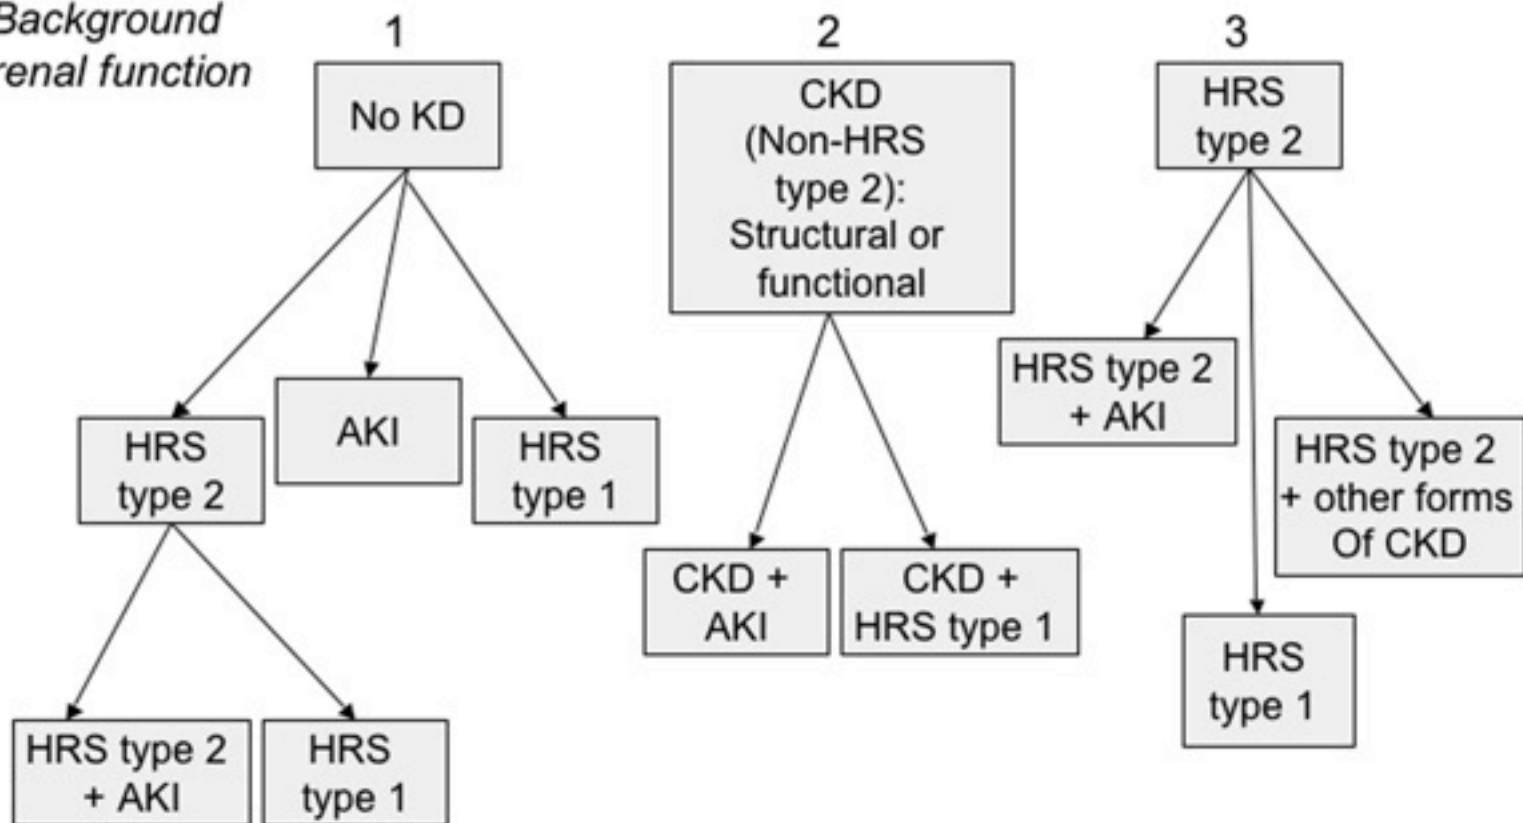

Supplement: MOESM1 [file 9708468]
